# Supplementary material for: Genetic Diversity and Evolutionary Kinetics of Influenza A Virus H3N2 Subtypes Circulating in Riyadh, Saudi Arabia
Source: MDPI journal article supplement (doi:10.3390/vaccines11030702), 2023-03-20
Supplement: s1 [file s1]

**Table S1:** List of sequences data submitted to the GenBank with accession numbers

| NO | Strain                            | Accession No. |          | Year |
|----|-----------------------------------|---------------|----------|------|
|    |                                   | HA Genes      | NA Genes |      |
| 1  | A/Saudi Arabia/VRG-01/2016(H3N2)  | ON514565      | ON514227 | 2016 |
| 2  | A/Saudi Arabia/VRG-02/2016(H3N2)  | ON514617      | ON514616 | 2016 |
| 3  | A/Saudi Arabia/VRG-03/2016(H3N2)  | ON520897      | ON520901 | 2016 |
| 4  | A/Saudi Arabia/VRG-04/2017(H3N2)  | ON521141      | ON521167 | 2017 |
| 5  | A/Saudi Arabia/VRG-15/2017(H3N2)  | ON521169      | ON521191 | 2017 |
| 6  | A/Saudi Arabia/VRG-23/2017(H3N2)  | ON521222      | ON521223 | 2017 |
| 7  | A/Saudi Arabia/VRG-27/2017(H3N2)  | ON522003      | ON524169 | 2017 |
| 8  | A/Saudi Arabia/VRG-32/2017(H3N2)  | ON524170      | ON524408 | 2017 |
| 9  | A/Saudi Arabia/VRG-44/2017(H3N2)  | ON627717      | ON524821 | 2017 |
| 10 | A/Saudi Arabia/VRG-45/2017(H3N2)  | ON524823      | ON524824 | 2017 |
| 11 | A/Saudi Arabia/VRG-46/2018(H3N2)  | ON524839      | ON524860 | 2018 |
| 12 | A/Saudi Arabia/VRG-51/2018(H3N2)  | ON524871      | ON525112 | 2018 |
| 13 | A/Saudi Arabia/VRG-54/2018(H3N2)  | ON527514      | ON527515 | 2018 |
| 14 | A/Saudi Arabia/VRG-55/2018(H3N2)  | ON527517      | ON527519 | 2018 |
| 15 | A/Saudi Arabia/VRG-57/2018(H3N2)  | ON527525      | ON527526 | 2018 |
| 16 | A/Saudi Arabia/VRG-58/2018(H3N2)  | ON527530      | ON527548 | 2018 |
| 17 | A/Saudi Arabia/VRG-42/2020(H3N2)  | OP536171      | OP536586 | 2020 |
| 18 | A/Saudi Arabia/VRG-46/2020(H3N2)  | OP536200      | OP536588 | 2020 |
| 19 | A/Saudi Arabia/VRG-48/2020(H3N2)  | OP536201      | OP536589 | 2020 |
| 20 | A/Saudi Arabia/VRG-49/2020(H3N2)  | OP536205      | OP536988 | 2020 |
| 21 | A/Saudi Arabia/VRG-57/2020(H3N2)  | OP536209      | OP537019 | 2020 |
| 22 | A/Saudi Arabia/VRG-138/2020(H3N2) | OP536417      | OP537028 | 2020 |

**Table S2:** List of H3N2 strains included in sequence and phylogenetic analysis

| No. | Strain              | Origin   | Collection<br>Date | Gisaid Accession No. |           | Gisaid Clade |
|-----|---------------------|----------|--------------------|----------------------|-----------|--------------|
|     |                     |          |                    | HA                   | NA        |              |
| 1.  | A-New York-392-2004 | USA-Ref. | 2004               | EPI252225            | EPI79013  | 3C.2a        |
| 2.  | A-NewJersey-26-2014 | USA      | 2014               | EPI841441            | EPI841440 | 3C.2a        |

|     |                                 |              |      |            |            |              |
|-----|---------------------------------|--------------|------|------------|------------|--------------|
| 3.  | A-Fiji-2-2015                   | New Zealand  | 2015 | EPI636655  | EPI636655  | 3C.2a        |
| 4.  | A-Canberra-7-2016               | Australia    | 2016 | EPI866694  | EPI793167  | 3C.2a1       |
| 5.  | A-Singapore-Infimh-16-0019-2016 | Singapore    | 2015 | EPI1381186 | EPI1381185 | 3C.2a1       |
| 6.  | A-SouthCarolina-4-2017          | USA          | 2017 | EPI1094351 | EPI1094350 | 3C.2a1       |
| 7.  | A-Sydney-22-2018                | Australia    | 2018 | EPI1251865 | EPI1251864 | 3C.2a1b.1    |
| 8.  | A-Afghanistan-833-2017          | Afghanistan  | 2017 | EPI1197229 | EPI1197228 | 3C.2a1b.1    |
| 9.  | A-AbuDhabi-240-2018             | UAE          | 2018 | EPI1245538 | EPI1245537 | 3C.2a1b.1    |
| 10. | A-SouthAfrica-645-2020          | South Africa | 2020 | EPI1759254 | EPI1759253 | 3c.2a1b.1a   |
| 11. | A-Niger-7306-2019               | Niger        | 2019 | EPI1651919 | EPI1651918 | 3c.2a1b.1a   |
| 12. | A-Togo-1307-2019                | Togo         | 2019 | EPI1683617 | EPI1683616 | 3c.2a1b.1a   |
| 13. | A-Malaysia-RP0961-2020          | MalaysiA     | 2020 | EPI1759278 | EPI1759277 | 3c.2a1b.1b   |
| 14. | A-HongKong-45-2019              | China        | 2019 | EPI1691930 | EPI1691929 | 3c.2a1b.1b   |
| 15. | A-HongKong-2671-2019            | China        | 2019 | EPI1592035 | EPI1592034 | 3c.2a1b.1b   |
| 16. | A-Egypt-7113-2019               | Egypt        | 2019 | EPI1882614 | EPI1882615 | 3c.2a1b.1b   |
| 17. | A-Kuwait-5141-2019              | Kuwait       | 2019 | EPI1719377 | EPI1719376 | 3c.2a1b.1b   |
| 18. | A-Beirut-AUB-1390-N-2020        | Lebanon      | 2020 | EPI1814744 | EPI1814743 | 3c.2a1b.2    |
| 19. | A-Iowa-60-2018                  | USA          | 2018 | EPI1324969 | EPI1359998 | 3c.2a1b.2    |
| 20. | A-Newcastle-82-2018             | UK           | 2018 | EPI1595444 | EPI1595443 | 3c.2a1b.2    |
| 21. | A-SouthAustralia-34-2019        | Australia    | 2019 | EPI1607117 | EPI1607116 | 3c.2a1b.2a   |
| 22. | A-Qatar-16-VI-19-0049409-2019   | Qatar        | 2019 | EPI1619516 | EPI1619517 | 3c.2a1b.2a   |
| 23. | A-Abudhabi-68-2019              | UAE          | 2019 | EPI1636325 | EPI1636324 | 3c.2a1b.2a   |
| 24. | A-Muscat-6972-2019              | Oman         | 2019 | EPI1646754 | EPI1646900 | 3c.2a1b.2a   |
| 25. | A-Bahrain-835-2019              | Bahrain      | 2019 | EPI1696676 | EPI1696675 | 3c.2a1b.2a.1 |
| 26. | A-Cambodia-e0826360-2020        | CambodiA     | 2020 | EPI1843589 | EPI1843588 | 3c.2a1b.2a.1 |
| 27. | A-Darwin-113-2020               | Australia    | 2020 | EPI1733843 | EPI1733842 | 3c.2a1b.2a.1 |
| 28. | A-Vietnam-Vnhcm-Vp260-2020      | Vietnam      | 2020 | EPI1848008 | EPI1848007 | 3c.2a1b.2a.2 |

|     |                                |              |      |            |            |              |
|-----|--------------------------------|--------------|------|------------|------------|--------------|
| 29. | A-Darwin-6-2021                | Australia    | 2021 | EPI1885402 | EPI1885401 | 3c.2a1b.2a.2 |
| 30. | A-Michigan-UOM10045667760-2020 | USA          | 2020 | EPI2095215 | EPI2095213 | 3c.2a1b.2a.2 |
| 31. | A-India-PUN-NIV239602-2020     | India        | 2020 | EPI1843873 | EPI1843872 | 3c.2a1b.2b   |
| 32. | A-KANAGAWA-ZC1853-2019         | Japan        | 2019 | EPI1398386 | EPI1398385 | 3c.2a1b.2b   |
| 33. | A-Hawaii-42-2019               | USA          | 2019 | EPI1486401 | EPI1486400 | 3c.2a1b.2b   |
| 34. | A-Germany-12119-2020           | Germany      | 2020 | EPI1756862 | EPI1756861 | 3c.2a2       |
| 35. | A-Brisbane-321-2016            | Australia    | 2016 | EPI919282  | EPI919281  | 3c.2a2       |
| 36. | A-NorthCarolina-4-2017         | USA          | 2017 | EPI925625  | EPI925624  | 3c.2a2       |
| 37. | A-Switzerland-8060-2017        | Switzerland  | 2017 | EPI1326015 | EPI1326014 | 3c.2a3       |
| 38. | A-Maryland-23-2016             | USA          | 2016 | EPI868424  | EPI868423  | 3c.2a3       |
| 39. | A-SaudiArabia-1028833307-2019  | Saudi Arabia | 2019 | EPI1754145 | EPI1754146 | 3c.2a3       |
| 40. | A-Sichuan-Ziliujing-1861-2019  | China        | 2019 | EPI1648634 | EPI1648633 | 3c.3         |
| 41. | A-Oman-4289-2014               | Oman         | 2014 | EPI551900  | EPI551901  | 3c.3         |
| 42. | A-Izmir-1020-2016              | Turkiye      | 2016 | EPI829311  | EPI829312  | 3c.3         |
| 43. | A-Jordan-4470-2016             | Jordan       | 2016 | EPI769557  | EPI769558  | 3c.3a        |
| 44. | A-Switzerland-9715293-2013     | Switzerland  | 2013 | EPI814528  | EPI814527  | 3c.3a        |
| 45. | A-Norway-466-2014              | Norway       | 2014 | EPI530647  | EPI530648  | 3c.3a        |
| 46. | A-Peru-27-2015                 | Peru         | 2015 | EPI629582  | EPI629581  | 3c.3a        |
| 47. | A-Nevada-22-2016               | USA          | 2016 | EPI747840  | EPI747839  | 3c.3a.1      |
| 48. | A-Kansas-14-2017               | USA          | 2017 | EPI1504535 | EPI1504534 | 3c.3a.1      |
| 49. | A-Indiana-8-2018               | USA          | 2018 | EPI1197165 | EPI1197164 | 3c.3a.1      |
| 50. | A-England-660-2019             | UK           | 2019 | EPI1741059 | EPI1741058 | 3C.2a        |
